# Supplementary material for: Unravelling potential plant health threats for the European Union: application of horizon scanning methodology
Source: Copernicus journal article supplement (doi:10.5194/we-25-189-2025), 2025-10-21
Supplement: Supplementary file 1 [file Table S1.xlsx]

## Sheet: 1. Topic list
Table 1S1. List of topics, the number of articles captured under each one and the corresponding topic group.
Topics	Number of articles	Group
Epidemiology	63	Assessment
Spread	61	Assessment
Modelling	24	Assessment
Risk Assessment	12	Assessment
Potential introduction	7	Assessment
Distribution	5	Assessment
Taxonomy	4	Assessment
Transmission	2	Assessment
Potential distribution	1	Assessment
Uncertainty	1	Assessment
Quarantine measure	269	Management
Detection method	219	Management
Control measure	217	Management
Management	73	Management
Surveillance	65	Management
Identification method	61	Management
Resistance	33	Management
Prevention	3	Management
Citizen science	1	Management
First finding	739	New observations
New finding	644	New observations
New pest	392	New observations
New host plant	325	New observations
Eradication	46	New observations
Interception	34	New observations
New vector	18	New observations
Absence	15	New observations
Entry	4	New observations
Description: Assessment topics cover the biology, potential damage, distribution, and modelling of pests. This includes detailed information on their physical characteristics, life cycles, transmission paths, and the impact they have on host plants or crops. Management is critical for preventing and mitigating the impact of pests. These strategies aim to control the entry and/or spread of pests. …

## Sheet: 2. Host list
Table 2S1. List of hosts and their corresponding category.
Commodity_host	Category		*Note: Plants that are non-native to the EU territory or not commercially traded were assigned to the "Non-EU" category, as this Horizon Scanning exercise is focused on EU risk managers.
Zea mays	Crop
Persea americana	Crop
Persea americana	Crop
Citrus x tangerina	Crop
Actinidia chinensis	Crop
Prunus dulcis	Crop
Glycine max	Crop
Nicotiana tabacum	Crop
Zea mays	Crop
Solanum tuberosum	Crop
Lactuca sativa	Crop
Solanum tuberosum	Crop
Daucus carota	Crop
Pyrus communis	Crop
Oryza sativa	Crop
Capsicum annuum	Crop
Oryza sativa	Crop
Cucurbita pepo	Crop
Triticum	Crop
Oryza sativa	Crop
Citrus	Crop
Petroselinum crispum	Crop
Cucurbita pepo	Crop
Daucus carota	Crop
Citrus	Crop
Glycine max	Crop
Carica papaya	Crop
Citrus sinensis	Crop
Solanum tuberosum	Crop
Punica granatum	Crop
Prunus dulcis	Crop
Vitis vinifera	Crop
Glycine max	Crop
Olea europaea	Crop
Pistacia vera	Crop
Actinidia chinensis	Crop
Cocos nucifera	Crop
Solanum tuberosum	Crop
Citrus	Crop
Oryza sativa	Crop
Prunus armeniaca	Crop
Coffea	Crop
Momordica	Crop
Prunus dulcis	Crop
Vicia faba	Crop
Coix chinensis	Crop
Fragaria x ananassa	Crop
Citrullus lanatus	Crop
Solanum lycopersicum	Crop
Sesamum indicum	Crop
Solanum tuberosum	Crop
Prunus	Crop
Zea mays	Crop
Zea mays	Crop
Citrus	Crop
Prunus persica	Crop
Citrullus lanatus	Crop
Musa	Crop
Capsicum annuum	Crop
Citrus	Crop
Plukenetia volubilis	Crop
Pyrus communis	Crop
Prunus persica	Crop
Olea europaea	Crop
Actinidia chinensis	Crop
Petroselinum crispum	Crop
Petroselinum crispum	Crop
Solanum lycopersicum	Crop
Petroselinum crispum	Crop
Petroselinum crispum	Crop
Solanum tuberosum	Crop
Punica granatum	Crop
Allium cepa	Crop
Zea mays	Crop
Prunus dulcis	Crop
Citrus aurantium	Crop
Citrus maxima	Crop
Pyrus communis	Crop
Vigna unguiculata	Crop
Passiflora edulis	Crop
Vitis vinifera	Crop
Vaccinium	Crop
Malus pumila	Crop
Vitis vinifera	Crop
Citrus	Crop
Citrus	Crop
Solanum tuberosum	Crop
Carica papaya	Crop
Solanum tuberosum	Crop
Solanum lycopersicum	Crop
Solanum tuberosum	Crop
Panax quinquefolius	Crop
Vitis vinifera	Crop
Fragaria x ananassa	Crop
Hordeum vulgare	Crop
Mangifera indica	Crop
Petroselinum crispum	Crop
Solanum lycopersicum	Crop
Solanum lycopersicum	Crop
Olea europaea	Crop
Solanum lycopersicum	Crop
Cucurbita pepo	Crop
Phoenix dactylifera	Crop
Solanum lycopersicum	Crop
Solanum tuberosum	Crop
Solanum tuberosum	Crop
Cnidium officinale	Crop
Solanum lycopersicum	Crop
Beta vulgaris	Crop
Solanum lycopersicum	Crop
Solanum lycopersicum	Crop
Glycine max	Crop
Manihot esculenta	Crop
Zea mays	Crop
Solanum lycopersicum	Crop
Solanum lycopersicum	Crop
Solanum lycopersicum	Crop
Trifolium pratense	Crop
Trifolium pratense	Crop
Cucurbita pepo	Crop
Glycine max	Crop
Prunus dulcis	Crop
Passiflora edulis	Crop
Passiflora edulis	Crop
Passiflora edulis	Crop
Passiflora edulis	Crop
Citrus	Crop
Vitis vinifera	Crop
Vaccinium	Crop
Capsicum annuum	Crop
Camellia sinensis	Crop
Camellia sinensis	Crop
Vitis vinifera	Crop
Solanum lycopersicum	Crop
Solanum lycopersicum	Crop
Triticum	Crop
Ficus carica	Crop
Citrus	Crop
Musa	Crop
Olea europaea	Crop
Averrhoa carambola	Crop
Malus	Crop
Vaccinium	Crop
Vigna unguiculata	Crop
Malus	Crop
Cordyline fruticosa	Crop
Vitis vinifera	Crop
Vitis vinifera	Crop
Vitis vinifera	Crop
Vitis vinifera	Crop
Coffea canephora	Crop
Prunus persica	Crop
Physalis peruviana	Crop
Vaccinium	Crop
Ananas comosus	Crop
Humulus lupulus	Crop
Gossypium	Crop
Musa	Crop
Musa	Crop
Capsicum annuum	Crop
Solanaceae	Crop
Solanum tuberosum	Crop
Vitis vinifera	Crop
Zanthoxylum schinifolium	Crop
Physalis peruviana	Crop
Solanum lycopersicum	Crop
Solanum lycopersicum	Crop
Citrus	Crop
Gossypium	Crop
Solanum tuberosum	Crop
Glycine max	Crop
Solanum lycopersicum	Crop
Cucurbita pepo	Crop
Olea europaea	Crop
Malus	Crop
Ipomoea batatas	Crop
Prunus	Crop
Pyrus communis	Crop
Abelmoschus esculentus	Crop
Mentha spicata	Crop
Vitis vinifera	Crop
Capsicum frutescens	Crop
Fragaria x ananassa	Crop
Pistacia vera	Crop
Vaccinium	Crop
Zea mays	Crop
Phoenix dactylifera	Crop
Phoenix dactylifera	Crop
Capsicum annuum	Crop
Musa	Crop
Castanea	Crop
Vitis vinifera	Crop
Prunus persica	Crop
Olea europaea	Crop
Olea europaea	Crop
Olea europaea	Crop
Saccharum	Crop
Ficus	Crop
Citrus	Crop
Citrus	Crop
Vaccinium	Crop
Phaseolus vulgaris	Crop
Psidium guajava	Crop
Solanum lycopersicum	Crop
Solanum lycopersicum	Crop
Cannabis sativa	Crop
Citrus sinensis	Crop
Zea mays	Crop
Vitis vinifera	Crop
Prunus dulcis	Crop
Passiflora edulis	Crop
Castanea	Crop
Pistacia vera	Crop
Castanea	Crop
Eriobotrya japonica	Crop
Citrus x limon	Crop
Hevea brasiliensis	Crop
Fragaria x ananassa	Crop
Prunus avium	Crop
Vaccinium corymbosum	Crop
Vaccinium corymbosum	Crop
Vaccinium corymbosum	Crop
Vaccinium corymbosum	Crop
Corylus avellana	Crop
Solanum tuberosum	Crop
Vitis vinifera	Crop
Solanum lycopersicum	Crop
Capsicum annuum	Crop
Capsicum annuum	Crop
Cucurbitaceae	Crop
Actinidia deliciosa	Crop
Phaseolus vulgaris	Crop
Citrus	Crop
Solanum lycopersicum	Crop
Citrus sinensis	Crop
Eriobotrya japonica	Crop
Humulus lupulus	Crop
Corylus avellana	Crop
Fragaria x ananassa	Crop
Vitis labrusca	Crop
Foeniculum vulgare	Crop
Carica papaya	Crop
Solanum lycopersicum	Crop
Solanum melongena	Crop
Foeniculum vulgare	Crop
Malus	Crop
Elettaria cardamomum	Crop
Cucumis melo	Crop
Phaseolus vulgaris	Crop
Prunus salicina	Crop
Capsicum annuum	Crop
Solanum lycopersicum	Crop
Cucurbita moschata	Crop
Vaccinium corymbosum	Crop
Ceratonia siliqua	Crop
Ilex paraguariensis	Crop
Olea europaea	Crop
Theobroma cacao	Crop
Citrus	Crop
Prunus cerasus	Crop
Saccharum officinarum	Crop
Carya illinoinensis	Crop
Oryza sativa	Crop
Glycine max	Crop
Camellia oleifera	Crop
Phaseolus vulgaris	Crop
Physalis peruviana	Crop
Prunus	Crop
Solanum lycopersicum	Crop
Solanum lycopersicum	Crop
Cucumis sativus	Crop
Pyrus pyrifolia	Crop
Glycine max	Crop
Physalis minima	Crop
Zea mays	Crop
Zea mays	Crop
Solanum melongena	Crop
Malus	Crop
Citrus	Crop
Citrus	Crop
Malus	Crop
Saccharum officinarum	Crop
Persea americana	Crop
Diospyros kaki	Crop
Diospyros kaki	Crop
Diospyros kaki	Crop
Morus alba	Crop
Nicotiana tabacum	Crop
Solanum lycopersicum	Crop
Malus communis	Crop
Oryza sativa	Crop
Citrus	Crop
Zea mays	Crop
Capsicum annuum	Crop
Solanum lycopersicum	Crop
Citrullus lanatus	Crop
Solanum lycopersicum	Crop
Citrus	Crop
Cucumis sativus	Crop
Ipomoea batatas	Crop
Solanum lycopersicum	Crop
Cucumis melo	Crop
Lavandula x intermedia	Crop
Olea europaea	Crop
Vitis vinifera	Crop
Persea americana	Crop
Solanum lycopersicum	Crop
Solanum tuberosum	Crop
Vitis vinifera	Crop
Capsicum annuum	Crop
Vitis vinifera	Crop
Vaccinium	Crop
Ipomoea batatas	Crop
Solanum lycopersicum	Crop
Benincasa fistulosa	Crop
Zea mays	Crop
Prunus dulcis	Crop
Olea europaea	Crop
Lavandula x intermedia	Crop
Solanum lycopersicum	Crop
Prunus avium	Crop
Morus alba	Crop
Corylus avellana	Crop
Cannabis sativa	Crop
Camellia sinensis	Crop
Vitis vinifera	Crop
Cucumis sativus	Crop
Solanum lycopersicum	Crop
Zea mays	Crop
Olea europaea	Crop
Olea europaea	Crop
Prunus salicina	Crop
Actinidia	Crop
Vitis vinifera var. Cabernet Gernischt	Crop
Vaccinium corymbosum	Crop
Chenopodium quinoa	Crop
Coffea	Crop
Ficus	Crop
Capsicum annuum	Crop
Solanum lycopersicum	Crop
Olea europaea	Crop
Medicago sativa	Crop
Camellia sinensis	Crop
Passiflora edulis	Crop
Lactuca sativa	Crop
Triticum	Crop
Triticum	Crop
Pisum sativum	Crop
Pyrus pyrifolia	Crop
Allium cepa	Crop
Solanaceae	Crop
Solanum tuberosum	Crop
Solanum lycopersicum	Crop
Olea europaea	Crop
Ficus carica	Crop
Angelica keiskei	Crop
Citrus	Crop
Persea americana	Crop
Persea americana	Crop
Persea americana	Crop
Cucumis sativus	Crop
Phaseolus vulgaris	Crop
Musa	Crop
Triticum aestivum	Crop
Cannabis sativa	Crop
Citrus	Crop
Raphanus sativus	Crop
Ananas comosus	Crop
Ananas comosus	Crop
Ananas comosus	Crop
Glycine max	Crop
Citrus	Crop
Glycine max	Crop
Zea mays	Crop
Solanum lycopersicum	Crop
Solanum lycopersicum	Crop
Cucurbita pepo	Crop
Prunus domestica	Crop
Phaseolus vulgaris	Crop
Capsicum annuum	Crop
Medicago sativa	Crop
Passiflora edulis	Crop
Capsicum frutescens	Crop
Plectranthus amboinicus	Crop
Glycine max	Crop
Punica granatum	Crop
Stevia rebaudiana	Crop
Lamiaceae	Crop
Lamiaceae	Crop
Lamiaceae	Crop
Lamiaceae	Crop
Triticum aestivum	Crop
Glycine max	Crop
Capsicum annuum	Crop
Glycine max	Crop
Vitis vinifera	Crop
Solanum lycopersicum	Crop
Solanum lycopersicum	Crop
Prunus	Crop
Chenopodium quinoa	Crop
Solanum tuberosum	Crop
Vitis vinifera	Crop
Capsicum annuum	Crop
Solanum lycopersicum	Crop
Capsicum annuum	Crop
Solanum lycopersicum	Crop
Solanum lycopersicum	Crop
Citrus	Crop
Solanum lycopersicum	Crop
Cucurbita pepo	Crop
Citrus paradisi x Citrus reticulata	Crop
Citrus paradisi x Citrus reticulata	Crop
Malus domestica	Crop
Hylocereus	Crop
Corylus avellana	Crop
Passiflora edulis	Crop
Oryza sativa	Crop
Actinidia chinensis	Crop
Musa	Crop
Coffea	Crop
Solanum tuberosum	Crop
Solanum tuberosum	Crop
Vicia faba	Crop
Cucumis sativus	Crop
Glycine max	Crop
Hordeum vulgare	Crop
Citrus aurantium	Crop
Solanum melongena	Crop
Triticum aestivum	Crop
Vitis vinifera	Crop
Triticum aestivum	Crop
Fragaria x ananassa	Crop
Fragaria x ananassa	Crop
Zea mays	Crop
Vitis vinifera	Crop
Cocos nucifera	Crop
Passiflora edulis	Crop
Prunus persica	Crop
Cucurbitaceae	Crop
Cucurbitaceae	Crop
Humulus lupulus	Crop
Glycine max	Crop
Zea mays	Crop
Physalis peruviana	Crop
Prunus dulcis	Crop
Ananas comosus	Crop
Aloe vera	Crop
Citrus	Crop
Zea mays	Crop
Cicer aretinium	Crop
Solanum lycopersicum	Crop
Olea europaea	Crop
Prunus avium	Crop
Lactuca sativa	Crop
Musa	Crop
Oryza sativa	Crop
Solanum tuberosum	Crop
Solanum tuberosum	Crop
Zingiber officinale	Crop
Citrus aurantium	Crop
Solanum aethiopicum	Crop
Ipomoea batatas	Crop
Citrullus lanatus	Crop
Vitis vinifera	Crop
Vitis vinifera	Crop
Glycine max	Crop
Prunus persica	Crop
Actinidia deliciosa	Crop
Capsicum annuum	Crop
Allium sativum	Crop
Pisum sativum	Crop
Musa	Crop
Passiflora edulis	Crop
Passiflora edulis	Crop
Ribes nigrum	Crop
Citrus	Crop
Cucumis sativus	Crop
Citrus	Crop
Corylus avellana	Crop
Corylus avellana	Crop
Solanum lycopersicum	Crop
Citrus	Crop
Citrus	Crop
Citrus	Crop
Citrus	Crop
Fragaria x ananassa	Crop
Morus alba	Crop
Solanum tuberosum	Crop
Citrus	Crop
Solanum lycopersicum	Crop
Cucumis sativus	Crop
Musa	Crop
Vitis vinifera	Crop
Solanum lycopersicum	Crop
Solanum lycopersicum	Crop
Ceratonia siliqua	Crop
Vitis vinifera	Crop
Olea europaea	Crop
Allium cepa	Crop
Nicotiana tabacum	Crop
Nicotiana tabacum	Crop
Solanum lycopersicum	Crop
Solanum lycopersicum	Crop
Solanum lycopersicum	Crop
Solanum lycopersicum	Crop
Solanum lycopersicum	Crop
Citrus	Crop
Vitis vinifera	Crop
Solanum lycopersicum	Crop
Solanum lycopersicum	Crop
Solanum lycopersicum	Crop
Solanum lycopersicum	Crop
Olea europaea	Crop
Beta vulgaris	Crop
Cucurbita moschata	Crop
Cucurbita pepo	Crop
Humulus lupulus	Crop
Malus domestica	Crop
Pistacia vera	Crop
Cucurbita pepo	Crop
Cucurbita pepo	Crop
Malus domestica	Crop
Punica granatum	Crop
Citrus	Crop
Citrus sinensis	Crop
Musa	Crop
Vitis vinifera	Crop
Brassicaceae	Crop
Hylocereus	Crop
Apium graveolens	Crop
Solanum lycopersicum	Crop
Ricinus communis	Crop
Musa	Crop
Vitis vinifera	Crop
Glycine max	Crop
Brassica napus	Crop
Solanum tuberosum	Crop
Solanum tuberosum	Crop
Solanum lycopersicum	Crop
Glycine max	Crop
Citrus x tangerina	Crop
Solanum lycopersicum	Crop
Orge commune	Crop
Citrus	Crop
Olea europaea	Crop
Zea mays	Crop
Olea europaea	Crop
Sorghum	Crop
Fragaria x ananassa	Crop
Fragaria x ananassa	Crop
Fragaria x ananassa	Crop
Vaccinium corymbosum	Crop
Capsicum annuum	Crop
Zea mays	Crop
Olea europaea	Crop
Petroselinum crispum	Crop
Prunus dulcis	Crop
Pistacia vera	Crop
Pistacia vera	Crop
Zea mays	Crop
Ficus carica	Crop
Musa	Crop
Corylus avellana	Crop
Corylus avellana	Crop
Olea europaea	Crop
Olea europaea	Crop
Nicotiana tabacum	Crop
Zea mays	Crop
Solanum lycopersicum	Crop
Solanum lycopersicum	Crop
Olea europaea	Crop
Setaria italica	Crop
Passiflora edulis	Crop
Punica granatum	Crop
Malus domestica	Crop
Oryza sativa	Crop
Vitis vinifera	Crop
Triticum	Crop
Fragaria x ananassa	Crop
Capsicum annuum	Crop
Fragaria x ananassa	Crop
Solanum lycopersicum	Crop
Capsicum frutescens	Crop
Gossypium hirsutum	Crop
Capsicum annuum	Crop
Solanum lycopersicum	Crop
Passiflora edulis	Crop
Cyperus esculentus	Crop
Benincasa hispida	Crop
Solanum tuberosum	Crop
Cyamopsis tetragonoloba	Crop
Malus domestica	Crop
Malus domestica	Crop
Coffea arabica	Crop
Hylocereus	Crop
Hylocereus	Crop
Fabaceae	Crop
Vaccinium corymbosum	Crop
Olea europaea	Crop
Solanum tuberosum	Crop
Solanum lycopersicum	Crop
Solanum lycopersicum	Crop
Coriandrum sativum	Crop
Solanum tuberosum	Crop
Solanum lycopersicum	Crop
Solanum	Crop
Citrus	Crop
Diospyros	Crop
Citrus medica	Crop
Mangifera indica	Crop
Citrus	Crop
Humulus lupulus	Crop
Rheum rhabarbarum	Crop
Saccharum officinarum	Crop
Corylus avellana	Crop
Oryza sativa	Crop
Humulus lupulus	Crop
Vitis vinifera	Crop
Persea americana	Crop
Diospyros	Crop
Zea mays	Crop
Solanum tuberosum	Crop
Punica granatum	Crop
Solanum lycopersicum	Crop
Solanum lycopersicum	Crop
Citrus	Crop
Hordeum vulgare	Crop
Glycine max	Crop
Pistacia vera	Crop
Solanum tuberosum	Crop
Solanum tuberosum	Crop
Fragaria x ananassa	Crop
Avena sativa	Crop
Musa	Crop
Dioscorea polystachya	Crop
Solanum lycopersicum	Crop
Solanum lycopersicum	Crop
Citrus	Crop
Triticum aestivum	Crop
Citrus	Crop
Ficus carica	Crop
Prunus	Crop
Oryza sativa	Crop
Solanum lycopersicum	Crop
Prunus domestica subsp. italica	Crop
Prunus domestica subsp. italica	Crop
Malus domestica	Crop
Ipomoea batatas	Crop
Ipomoea batatas	Crop
Cucumis melo	Crop
Zea mays	Crop
Crotalaria juncea	Crop
Physalis peruviana	Crop
Ipomoea batatas	Crop
Ipomoea batatas	Crop
Ipomoea batatas	Crop
Ipomoea batatas	Crop
Ipomoea batatas	Crop
Citrullus lanatus	Crop
Solanaceae	Crop
Solanaceae	Crop
Morus alba	Crop
Citrullus lanatus	Crop
Vitis vinifera	Crop
Solanum tuberosum	Crop
Triticum	Crop
Solanum tuberosum	Crop
Vitis vinifera	Crop
Malus domestica	Crop
Cucumber sativus	Crop
Oryza sativa	Crop
Carica papaya	Crop
Carica papaya	Crop
Morus alba	Crop
Cannabis sativa	Crop
Hylocereus undatus	Crop
Fragaria x ananassa	Crop
Helianthus annuus	Crop
Vitis vinifera	Crop
Ipomoea batatas	Crop
Solanum melongena	Crop
Psidium guajava	Crop
Zea mays	Crop
Citrus	Crop
Solanum lycopersicum	Crop
Capsicum annuum	Crop
Morus alba	Crop
Musa	Crop
Allium sativum	Crop
Ipomoea batatas	Crop
Ficus carica	Crop
Cucumis sativus	Crop
Fragaria x ananassa	Crop
Annona cherimola	Crop
Vitis vinifera	Crop
Spinacia oleracea	Crop
Fragaria x ananassa	Crop
Malus domestica	Crop
Prunus armeniaca	Crop
Solanum tuberosum	Crop
Citrus reticulata	Crop
Vigna unguiculata	Crop
Glycine max	Crop
Citrus	Crop
Vitis	Crop
Fragaria x ananassa	Crop
Zea mays	Crop
Solanum lycopersicum	Crop
Cucumis melo	Crop
Solanum lycopersicum	Crop
Solanum lycopersicum	Crop
Citrus	Crop
Corylus avellana	Crop
Solanum melongena	Crop
Musa	Crop
Fabaceae	Crop
Olea europaea	Crop
Oryza sativa	Crop
Zea mays	Crop
Cucurbita pepo	Crop
Zea mays	Crop
Citrus	Crop
Citrus maxima	Crop
Manihot esculenta	Crop
Solanum lycopersicum	Crop
Zea mays	Crop
Cucurbita pepo	Crop
Citrus	Crop
Vitis vinifera	Crop
Fragaria x ananassa	Crop
Vitis vinifera	Crop
Zea mays	Crop
Solanum lycopersicum	Crop
Actinidia	Crop
Actinidia	Crop
Citrus reticulata cv. Shatangju	Crop
Prunus dulcis	Crop
Citrus	Crop
Capsicum annuum	Crop
Triticum aestivum	Crop
Citrus	Crop
Citrus sinensis	Crop
Humulus lupulus	Crop
Oryza sativa	Crop
Ipomoea batatas	Crop
Solanum lycopersicum	Crop
Zea mays	Crop
Olea europaea	Crop
Vitis vinifera	Crop
Capsicum	Crop
Capsicum	Crop
Capsicum annuum	Crop
Eriobotrya japonica	Crop
Zea mays	Crop
Solanum melongena	Crop
Crotalaria juncea	Crop
Capsicum annuum	Crop
Cucurbita pepo	Crop
Prunus dulcis	Crop
Vitis vinifera	Crop
Prunus persica	Crop
Prunus persica	Crop
Fruit trees	Crop
Capsicum annuum	Crop
Phaseolus vulgaris	Crop
Eriobotrya japonica	Crop
Citrus	Crop
Citrus aurantifolia	Crop
Solanum tuberosum	Crop
Punica granatum	Crop
Cucurbita pepo	Crop
Solanum tuberosum	Crop
Cucurbitaceae	Crop
Allium cepa	Crop
Allium cepa	Crop
Ficus carica	Crop
Fragaria x ananassa	Crop
Solanum tuberosum	Crop
Zea mays	Crop
Musa	Crop
Citrus	Crop
Prunus persica	Crop
Citrullus lanatus	Crop
Hordeum vulgare	Crop
Triticum aestivum	Crop
Lens culinaris	Crop
Lens culinaris	Crop
Citrus x limon	Crop
Ocimum basillicum	Crop
Glycine max	Crop
Glycine max	Crop
Nicotiana tabacum	Crop
Solanum lycopersicum	Crop
Ficus carica	Crop
Citrus	Crop
Citrus	Crop
Lactuca sativa	Crop
Malus domestica	Crop
Corylus avellana	Crop
Corylus avellana	Crop
Citrus medica	Crop
Citrus medica	Crop
Phaseolus vulgaris	Crop
Phaseolus vulgaris	Crop
Fragaria x ananassa	Crop
Fragaria x ananassa	Crop
Selenicereus costaricensis	Crop
Pyrus communis	Crop
Ziziphus mauritiana	Crop
Solanum tuberosum	Crop
Lactuca sativa	Crop
Lactuca sativa	Crop
Ricinus communis	Crop
Brassica oleracea var. botrytis	Crop
Brassica oleracea var. botrytis	Crop
Chrysopogon zizanioides	Crop
Punica granatum	Crop
Carica papaya	Crop
Castanea sativa	Crop
Corylus avellana	Crop
Prunus persica	Crop
Prunus persica	Crop
Pyrus communis	Crop
Cucumis melo	Crop
Glycine max	Crop
Selenicereus megalanthus	Crop
Solanum tuberosum	Crop
Capsicum annuum	Crop
Citrus reticulata	Crop
Citrus reticulata	Crop
Glycine max	Crop
Citrus	Crop
Solanum lycopersicum	Crop
Vaccinium corymbosum	Crop
Caulocasia esculenta	Crop
Cucurbitaceae	Crop
Zea mays	Crop
Nicotiana tabacum	Crop
Solanum lycopersicum	Crop
Cucurbita pepo	Crop
Zea mays	Crop
Capsicum annuum	Crop
Capsicum annuum	Crop
Arachis hypogaea	Crop
Solanum lycopersicum	Crop
Carya illinoinensis	Crop
Fragaria x ananassa	Crop
Fragaria x ananassa	Crop
Olea europaea	Crop
Olea europaea	Crop
Corylus avellana	Crop
Corylus avellana	Crop
Abelmoschus esculentus	Crop
Solanum melongena	Crop
Solanum melongena	Crop
Morus alba	Crop
Zea mays	Crop
Fragaria x ananassa	Crop
Ficus carica	Crop
Ananas comosus	Crop
Ananas comosus	Crop
Ananas comosus	Crop
Oryza sativa	Crop
Cynara cardunculus var. scolymus	Crop
Cannabis sativa	Crop
Prunus	Crop
Solanum	Crop
Solanum	Crop
Solanum lycopersicum	Crop
Castanea mollissima	Crop
Citrus unshiu	Crop
Oryza sativa	Crop
Citrus	Crop
Citrus	Crop
Citrus	Crop
Allium cepa	Crop
Prunus dulcis	Crop
Beta vulgaris	Crop
Beta vulgaris	Crop
Vicia faba	Crop
Corylus avellana	Crop
Pyrus communis	Crop
Vaccinium macrocarpon	Crop
Aloe vera	Crop
Nicotiana tabacum	Crop
Nicotiana tabacum	Crop
Cucurbitaceae	Crop
Matricaria recutita	Crop
Cucurbitaceae	Crop
Solanum lycopersicum	Crop
Ricinus communis	Crop
Eriobotrya japonica	Crop
Eriobotrya japonica	Crop
Eriobotrya japonica	Crop
Eriobotrya japonica	Crop
Cucurbita	Crop
Vicia faba	Crop
Capsicum annuum	Crop
Citrus	Crop
Cicer arietinum	Crop
Prunus domestica	Crop
Solanum tuberosum	Crop
Avena sativa	Crop
Morus alba	Crop
Morus alba	Crop
Cucumis sativus	Crop
Solanum lycopersicum	Crop
Humulus lupulus	Crop
Vicia sativa	Crop
Mangifera indica	Crop
Aloe vera	Crop
Zea mays	Crop
Hylocereus	Crop
Selenicereus costaricensis	Crop
Fragaria x ananassa	Crop
Olea europaea	Crop
Lactuca sativa	Crop
Zea mays	Crop
Manihot esculenta	Crop
Manihot esculenta	Crop
Oryza sativa	Crop
Solanum lycopersicum	Crop
Triticum aestivum	Crop
Carica papaya	Crop
Malus domestica	Crop
Malus domestica	Crop
Malus domestica	Crop
Malus domestica	Crop
Malus domestica	Crop
Diospyros kaki	Crop
Prunus domestica	Crop
Saccharum officinarum	Crop
Saccharum officinarum	Crop
Oryza sativa	Crop
Arachis pintoi	Crop
Arachis pintoi	Crop
Spinacia oleracea	Crop
Cucurbitae	Crop
Rubus idaeus	Crop
Fragaria x ananassa	Crop
Citrus	Crop
Vitis vinifera	Crop
Zea mays	Crop
Fragaria x ananassa	Crop
Vaccinium vitis-idaea	Crop
Vaccinium vitis-idaea	Crop
Solanum tuberosum	Crop
Persea america	Crop
Glycine max	Crop
Glycine max	Crop
Fragaria x ananassa	Crop
Helianthus annuus	Crop
Vaccinium oxycoccos; Musa	Crop; Crop
Manihot esculenta; Solanum lycopersicum	Crop; Crop
Citrullus lanatus; Cucumis melo	Crop; Crop
Vicia faba; Cicer arietinum	Crop; Crop
Capsicum annuum; Cucumis melo	Crop; Crop
Cucurbita pepo; Cucumis sativus	Crop; Crop
Cucurbita pepo; Cucumis sativus	Crop; Crop
Citrus x limon; Citrus sinensis	Crop; Crop
Capsicum annuum; Solanum lycopersicum	Crop; Crop
Vigna radiata; Vigna mungo	Crop; Crop
Citrullus lanatus; Cucumis melo	Crop; Crop
Citrus jambhiri; Citrus reticulata	Crop; Crop
Chenopodium quinoa; Triticum turgidum subsp. Durum	Crop; Crop
Citrullus lanatus; Cucurbita pepo	Crop; Crop
Cucumis sativus; Solanum lycopersicum	Crop; Crop
Capsicum annuum; Solanum lycopersicum	Crop; Crop
Solanum lycopersicum; Capsicum annuum	Crop; Crop
Citrus; Lavandula	Crop; Crop
Cucumis melo; Cucumis sativus; Cucurbita pepo	Crop; Crop; Crop
Cucumis melo; Cucumis sativus; Cucurbita pepo	Crop; Crop; Crop
Cucumis melo; Cucumis sativus; Cucurbita pepo	Crop; Crop; Crop
Cucumis melo; Cucumis sativus; Luffa aegyptiaca	Crop; Crop; Crop
Cucumis sativus; Cucumis melo; Cucurbita pepo	Crop; Crop; Crop
Phaseolus vulgaris; Glycine max; Phaseolus acutifolius	Crop; Crop; Crop
Solanum aethiopicum; Solanum melongena; Solanum macrocarpon	Crop; Crop; Crop
Coffea arabica; Glyptostrobus pensilis; Passiflora edulis	Crop; Crop; Crop
Averrhoa bilimbi; Malpighia emarginata; Psidium guajava	Crop; Crop_Crop non EU; Crop
Corylus avellana; Corylus colurna	Crop; Forest
Corylus avellana; Corylus colurna	Crop; Forest
Laurus nobilis; Liquidambar styraciflua	Crop; Ornamental
Cyperus esculentus; Cyperus rotundus	Crop; Wild
Malpighia emarginata	Crop_Crop non EU
Mesona chinensis	Crop_Crop non EU
Lablab purpureus	Crop_Crop non EU
Sassafras	Forest
Quercus	Forest
Fagus sylvatica	Forest
Abies	Forest
Pinus	Forest
Juglans nigra	Forest
Populus	Forest
Eucalyptus	Forest
Eucalyptus	Forest
Eucalyptus	Forest
Picea rubens	Forest
Juglans nigra	Forest
Ulmus	Forest
Populus purdomii	Forest
Juglans regia	Forest
Pinus mugo	Forest
Fraxinus	Forest
Juglans regia	Forest
Pinus	Forest
Fagus sylvatica	Forest
Quercus	Forest
Quercus	Forest
Eucalyptus pellita	Forest
Fraxinus excelsior	Forest
Ulmus	Forest
Quercus robur	Forest
Quercus robur	Forest
Eucalyptus	Forest
Robinia pseudoacacia	Forest
Alnus glutinosa	Forest
Quercus	Forest
Quercus	Forest
Quercus	Forest
Pistacia lentiscus	Forest
Pinus	Forest
Juglans regia	Forest
Quercus	Forest
Quercus variabilis	Forest
Pinus pinea	Forest
Alnus	Forest
Eucalyptus	Forest
Quercus	Forest
Populus x euramericana	Forest
Eucalyptus	Forest
Juglans regia	Forest
Juglans regia	Forest
Chamaecyparis lawsoniana	Forest
Eucalyptus	Forest
Pinus	Forest
Quercus robur	Forest
Acer	Forest
Juglans	Forest
Muntingia calabura	Forest
Alnus glutinosa	Forest
Populus tremuloides	Forest
Myrtus communis	Forest
Quercus	Forest
Juglans regia	Forest
Fraxinus excelsior	Forest
Picea crassifolia	Forest
Eucalyptus	Forest
Pinus taeda	Forest
Fraxinus excelsior	Forest
Fraxinus excelsior	Forest
Eucalyptus	Forest
Juglans regia	Forest
Fagus grandifolia	Forest
Pinus	Forest
Sapindus mukorossi	Forest
Quercus	Forest
Acer	Forest
Sassafras albidum	Forest
Quercus suber	Forest
Quercus suber	Forest
Acer pseudoplatanus	Forest
Quercus coccifera	Forest
Tsuga heterophylla	Forest
Pinus	Forest
Juglans regia	Forest
Quercus alba	Forest
Pinus	Forest
Juglans nigra	Forest
Pinus pinea	Forest
Populus alba	Forest
Fraxinus excelsior	Forest
Fraxinus chinensis	Forest
Salicaceae	Forest
Juglans regia	Forest
Pistacia lentiscus var. Chia	Forest
Juglans regia	Forest
Pinus	Forest
Alnus glutinosa	Forest
Pinus pinea	Forest
Pinus pinea	Forest
Alnus glutinosa	Forest
Alnus glutinosa	Forest
Juglans regia	Forest
Platanus x hispanica	Forest
Quercus variabilis	Forest
Quercus	Forest
Quercus	Forest
Quercus	Forest
Quercus	Forest
Sassafras albidum	Forest
Pinus	Forest
Eucalyptus pellita	Forest
Fagus grandifolia	Forest
Populus deltoides	Forest
Fraxinus americana	Forest
Pinus	Forest
Quercus robur	Forest
Quercus ilex	Forest
Quercus ilex	Forest
Quercus ilex	Forest
Quercus ilex	Forest
Quercus myrsinifolia	Forest
Pseudotsuga menziesii	Forest
Larix kaempferi	Forest
Juglans regia	Forest
Juglans regia	Forest
Quercus	Forest
Quercus	Forest
Quercus	Forest
Quercus	Forest
Juniperus	Forest
Populus euphratica	Forest
Platanus x hispanica	Forest
Eucalyptus smithii	Forest
Eucalyptus smithii	Forest
Juglans regia; Juglans nigra	Forest
Juglans regia	Forest
Acer; Morus alba	Forest; Crop
Pinus sylvestris; Picea abies	Forest; Forest
Fraxinus excelsior; Fraxinus ornus	Forest; Forest
Fraxinus excelsior; Fraxinus ornus	Forest; Forest
Carpinus caroliniana; Quercus rubra	Forest; Forest
Fraxinus excelsior; Fraxinus ornus	Forest; Forest
Corymbia; Eucalyptus	Forest; Forest
Quercus robur; Quercus petraea	Forest; Forest
Quercus robur; Quercus petraea	Forest; Forest
Quercus robur; Quercus petraea	Forest; Forest
Alnus glutinosa; Alnus incana	Forest; Forest
Murraya paniculata	Ornamental
Polygala myrtifolia	Ornamental
Arecaceae	Ornamental
Arecaceae	Ornamental
Rosa pendulina	Ornamental
Euphorbia pulcherrima	Ornamental
Zinnia elegans	Ornamental
Magnolia	Ornamental
Petunia	Ornamental
Epiphyllum	Ornamental
Rosa	Ornamental
Epiphyllum	Ornamental
Rhododendron	Ornamental
Arecaceae	Ornamental
Helichrysum bracteatum	Ornamental
Fagus crenata	Ornamental
Mirabilis jalapa	Ornamental
Nerium oleander	Ornamental
Hibiscus rosa-sinensis	Ornamental
Platycodon grandiflorus	Ornamental
Podocarpus macrophyllus	Ornamental
Ailanthus altissima	Ornamental
Dypsis lutescens	Ornamental
Hedera helix	Ornamental
Broussonetia papyrifera	Ornamental
Broussonetia papyrifera	Ornamental
Platanus orientalis	Ornamental
Geranium	Ornamental
Bougainvillea	Ornamental
Camellia japonica	Ornamental
Cestrum nocturnum	Ornamental
Cestrum nocturnum	Ornamental
Codiaeum variegatum	Ornamental
Narcissus tazetta	Ornamental
Zamia fischeri	Ornamental
Epiphyllum	Ornamental
Lagerstroemia	Ornamental
Lagerstroemia	Ornamental
Carissa macrocarpa	Ornamental
Carissa macrocarpa	Ornamental
Rosa	Ornamental
Broussonetia papyrifera	Ornamental
Rosa	Ornamental
Chrysanthemum	Ornamental
Rosa	Ornamental
Dypsis lutescens	Ornamental
Broussonetia papyrifera	Ornamental
Broussonetia papyrifera	Ornamental
Mandevilla	Ornamental
Rosa	Ornamental
Chrysanthemum	Ornamental
Chrysanthemum	Ornamental
Rosa	Ornamental
Catharanthus roseus	Ornamental
Platanus	Ornamental
Salix matsudana	Ornamental
Dianthus barbatus	Ornamental
Dianthus barbatus	Ornamental
Dypsis poivreana	Ornamental
Platycodon grandiflorus	Ornamental
Amaryllidaceae	Ornamental
Amaryllidaceae	Ornamental
Amaryllidaceae	Ornamental
Amaryllidaceae	Ornamental
Dracaena trifasciata	Ornamental
Rosa	Ornamental
Amaryllidaceae	Ornamental
Rheum palmatum	Ornamental
Taxus x media	Ornamental
Camellia	Ornamental
Allamanda cathartica	Ornamental
Rosa chinensis	Ornamental
Aloe arborescens	Ornamental
Phoenix canariensis	Ornamental
Phoenix canariensis	Ornamental
Paspalum vaginatum	Ornamental
Euphorbia pulcherrima	Ornamental
Celtis australis	Ornamental
Euphorbia pulcherrima	Ornamental
Pereskia aculeata	Ornamental
Celosia argentea var. cristata	Ornamental
Hydrangea arborescens	Ornamental
Caladium	Ornamental
Ficus microcarpa	Ornamental
Calystegia hederacea	Ornamental
Syringa oblata	Ornamental
Epipremnum aureum	Ornamental
Paeonia suffructicosa	Ornamental
Bougainvillea spectabilis	Ornamental
Calibrachoa	Ornamental
Calibrachoa	Ornamental
Rosa	Ornamental
Eucalyptus globulus	Ornamental
Salix babylonica	Ornamental
Ornamental	Ornamental
Podocarpus macrophyllus	Ornamental
Hibiscus	Ornamental
Hibiscus rosa-sinensis	Ornamental
Hibiscus rosa-sinensis	Ornamental
Monstera adansonii	Ornamental
Ipomoea cairica	Ornamental
Ficus microcarpa	Ornamental
Hydrangea quercifolia	Ornamental
Chrysanthemum indicum	Ornamental
Narcissus pseudonarcissus	Ornamental
Narcissus pseudonarcissus	Ornamental
Ligustrum lucidum	Ornamental
Monstera deliciosa	Ornamental
Colocasia esculenta	Ornamental
Phlox stolonifera	Ornamental
Zoysia matrella	Ornamental
Platanus occidentalis	Ornamental
Hydrangea macrophylla	Ornamental
Rhododendron fortunei	Ornamental
Eucalyptus globulus	Ornamental
Eucalyptus globulus	Ornamental
Monstera deliciosa	Ornamental
Ornamental	Ornamental
Vibernum odoratissimum	Ornamental
Iris lactea	Ornamental
Cotoneaster	Ornamental
Adenium obesum	Ornamental
Celosia argentea	Ornamental
Celosia argentea	Ornamental
Galtonia candicans	Ornamental
Galtonia candicans	Ornamental
Zamioculcas zamiifolia	Ornamental
Hibiscus rosa-sinensis	Ornamental
Juniperus chinensis var. globosa	Ornamental
Clivia miniata	Ornamental
Dahlia	Ornamental
Dahlia	Ornamental
Hibiscus rosa-sinensis	Ornamental
Hibiscus rosa-sinensis	Ornamental
Hibiscus rosa-sinensis	Ornamental
Hibiscus rosa-sinensis	Ornamental
Eustoma russellianum	Ornamental
Zinnia elegans	Ornamental
Platanus	Ornamental
Rosa	Ornamental
Rosa	Ornamental
Gloriosa superba	Ornamental
Selenicereus	Ornamental
Caladium x hortulanum	Ornamental
Jasminum nudiflorum	Ornamental
Petunia hybrida	Ornamental
Dodonaea viscosa; Medicago sativa	Ornamental; Crop
Monstera adansonii; Monstera deliciosa	Ornamental; Ornamental
Acer japonicum; Acer palmatum	Ornamental; Ornamental
Cercis canadensis; Crataegus viridis; Liquidambar styraciflua	Ornamental; Other_Ornamental non EU; Ornamental
Achyranthes bidentata	Other
Ipomoea purpurea	Other
Areca catechu	Other_Crop non EU
Ocimum gratissimum	Other_Crop non EU
Ocimum gratissimum	Other_Crop non EU
Ocimum gratissimum	Other_Crop non EU
Arachis pintoi	Other_Crop non EU
Ficus semicordata	Other_Crop non EU
Paullinia cupana	Other_Crop non EU
Pennisetum glaucum	Other_Crop non EU
Asimina triloba	Other_Crop non EU
Musa acuminata	Other_Crop non EU
Macrotyloma uniflorum	Other_Crop non EU
Abies grandis	Other_Forest non EU
Daphnandra johnsonii	Other_Forest non EU
Abies fraseri	Other_Forest non EU
Gleditsia triacanthos var. inermis	Other_Forest non EU
Araucaria araucana	Other_Forest non EU
Castanopsis cuspidata	Other_Forest non EU
Ormosia hosiei	Other_Forest non EU
Cryptomeria japonica	Other_Forest non EU
Metasequoia glyptostroboides	Other_Forest non EU
Chrysolepis chrysophylla	Other_Forest non EU
Cryptomeria japonica	Other_Forest non EU
Afrocarpus falcatus; Ligustrum japonicum; Quercus hemisphaerica	Other_Forest non EU; Ornamental; Forest
Crossandra infundibuliformis	Other_Ornamental non EU
Elaeocarpus decipiens	Other_Ornamental non EU
Crossandra infundibuliformis	Other_Ornamental non EU
Begonia bowerae	Other_Ornamental non EU
Carpinus betulus	Other_Ornamental non EU
Lophostemon confertus	Other_Ornamental non EU
Garcinia imbertii	Other_Ornamental non EU
Barleria cristata	Other_Ornamental non EU
Barleria cristata	Other_Ornamental non EU
Ixora chinensis	Other_Ornamental non EU
Cassia fistula	Other_Ornamental non EU
Brahea edulis; Jubaea chilensis; Phoenix reclinata; Sabal bermudana	Other_Ornamental non EU; Other_Ornamental non EU; Ornamental; Ornamental
Aristotelia chilensis	Other_Wild non EU
Aristotelia chilensis	Other_Wild non EU
Amaranthus cruentus	Other_Wild non EU
Zanthoxylum armatum v. novemfolius	Other_Wild non EU
Zanthoxylum armatum v. novemfolius	Other_Wild non EU
Zanthoxylum armatum v. novemfolius	Other_Wild non EU
Zanthoxylum armatum v. novemfolius	Other_Wild non EU
Albizia lebbeck	Other_Wild non EU
Agastache mexicana	Other_Wild non EU
Albizia lebbeck	Other_Wild non EU
Ornithogalum thyrsoides	Other_Wild non EU
Senna rizzinii	Other_Wild non EU
Valeriana fauriei	Other_Wild non EU
Albizia saman	Other_Wild non EU
Valeriana fauriei	Other_Wild non EU
Polygonatum kingianum	Other_Wild non EU
Costus spiralis	Other_Wild non EU
Paspalum guenoarum	Other_Wild non EU
Paspalum	Other_Wild non EU
Sida	Other_Wild non EU
Passiflora putumayensis	Other_Wild non EU
Sympthyotrichum	Other_Wild non EU
Alpinia	Other_Wild non EU
Alpinia	Other_Wild non EU
Trema tomentosa	Other_Wild non EU
Aconitum carmichaelii	Other_Wild non EU
Juncus microcephalus	Other_Wild non EU
Malvastrum coromandelianum	Other_Wild non EU
Malvastrum coromandelianum	Other_Wild non EU
Malvastrum coromandelianum	Other_Wild non EU
Malvastrum coromandelianum	Other_Wild non EU
Paris polyphylla var. yunnanensis	Other_Wild non EU
Melaleuca alternifolia	Other_Wild non EU
Nicotiana plumbaginifolia	Other_Wild non EU
Crataegus uniflora	Other_Wild non EU
Crataegus uniflora	Other_Wild non EU
Acalypha australis	Other_Wild non EU
Convolvulus virgatus	Other_Wild non EU
Ageratum conyzoides	Other_Wild non EU
Trichosanthes kirilowii	Other_Wild non EU
Physalis virginiana	Other_Wild non EU
Aegiceras corniculatum	Other_Wild non EU
Anemone japonica	Other_Wild non EU
Neltuma piurensis	Other_Wild non EU
Acalypha ostryifolia	Other_Wild non EU
Acalypha ostryifolia	Other_Wild non EU
Fagopyrum gracilipes	Other_Wild non EU
Tecomella undulata	Other_Wild non EU
Lonicera caerulea	Other_Wild non EU
Campomanesia dichotoma; Campomanesia ilhoensis	Other_Wild non EU; Crop
Campomanesia dichotoma; Campomanesia ilhoensis	Other_Wild non EU; Crop
Arctostaphylos viridissima; Arctostaphylos glauca	Other_Wild non EU; Other_Wild non EU
Arctostaphylos viridissima; Arctostaphylos glauca	Other_Wild non EU; Other_Wild non EU
Arctostaphylos viridissima; Arctostaphylos glauca	Other_Wild non EU; Other_Wild non EU
Vaccinium angustifolium; Vaccinium myrtilloides	Other_Wild non EU; Other_Wild non EU
Ageratum conyzoides; Solanum nigrum; Praxelis clematidea	Other_Wild non EU; Wild; Wild
Ageratum conyzoides; Solanum nigrum; Praxelis clematidea	Other_Wild non EU; Wild; Wild
Myrtus	Wild
Nicandra physaloides	Wild
Alliaria petiolata	Wild
Alliaria petiolata	Wild
Bellis perennis	Wild
Melothria pendula	Wild
Melothria pendula	Wild
Aquilegia	Wild
Aquilegia	Wild
Amaranthus	Wild
Opuntia	Wild
Crataegus	Wild
Aquilegia	Wild
Aquilegia	Wild
Asteraceae	Wild
Asteraceae	Wild
Asteraceae	Wild
Asteraceae	Wild
Asteraceae	Wild
Alhagi maurorum	Wild
Muscari	Wild
Nandina domestica	Wild
Alcea rosea	Wild
Alcea rosea	Wild
Satureja hortensis	Wild
Artemisia princeps	Wild
Solanum nigrum	Wild
Rubus	Wild
Alcea rosea	Wild
Trifolium repens	Wild
Cichorium intybus	Wild
Portulaca oleracea	Wild
Alcea rosea	Wild
Poa stuckertii	Wild
Scorzonera austriaca	Wild
Amaranthus retroflexus	Wild
Reseda lutea	Wild
Digitalis purpurea	Wild
Digitalis purpurea	Wild
Eclipta prostrata	Wild
Eclipta prostrata	Wild
Nasturtrium officinale	Wild
Lobelia siphilitica	Wild
Solanum sisymbriifolium	Wild
Solanum sisymbriifolium	Wild
Malva parviflora	Wild
Antirrhinum majus	Wild
Amaranthus	Wild
Artemisia thuscula	Wild
Rumex sanguineus	Wild
Solanum nigrum	Wild
Cyperaceae	Wild
Cyperaceae	Wild
Solanum nigrum	Wild
Solanum sisymbriifolium	Wild
Solanum sisymbriifolium	Wild
Solidago gigantea	Wild
Solanum nigrum	Wild
Solanum nigrum; Physalis minima	Wild; Crop
Amaranthus hybridus; Cajanus cajan; Allium cepa; Leptadenia hastata; Corchorus olitorius; Solanum macrocarpon; Ipomoea eriocarpa	Wild; Crop; Crop; Other_Wild non EU; Crop; Crop; Other_Wild non EU
Veronica spicata; Dendrochilum magnum	Wild; Ornamental
Veronica spicata; Dendrochilum magnum	Wild; Ornamental
Sisymbrium officinale; Raphanus raphanistrum	Wild; Wild
Polycarpon tetraphyllum; Convolvulus arvensis	Wild; Wild
Cistus psilosepalus; Erodium moschatum; Magnolia grandiflora	Wild; Wild; Ornamental
Setaria viridis; Eleusine indica; Echinochloa crus-galli	Wild; Wild; Wild

## Sheet: 3. Sources
Table 3S1. Distribution of number of sources (media or scientific) per number of articles
Type of source	Total number of sources	Total number of articles		*Note: Sources names are not shown to avoid conflict of interest.
Media	443	1
Media	78	2
Media	20	3
Media	18	4
Media	13	5
Media	12	6
Media	4	7
Media	7	8
Media	6	9
Media	2	10
Media	1	12
Media	1	15
Media	2	17
Media	1	19
Media	1	20
Media	1	22
Media	1	23
Media	1	25
Media	1	31
Media	1	33
Media	1	34
Media	1	36
Media	1	50
Scientific	154	1
Scientific	44	2
Scientific	21	3
Scientific	16	4
Scientific	7	5
Scientific	9	6
Scientific	3	7
Scientific	3	8
Scientific	4	9
Scientific	5	10
Scientific	2	11
Scientific	3	12
Scientific	4	13
Scientific	1	14
Scientific	3	15
Scientific	1	17
Scientific	4	18
Scientific	2	19
Scientific	1	20
Scientific	3	23
Scientific	1	24
Scientific	1	28
Scientific	1	33
Scientific	1	34
Scientific	1	36
Scientific	1	38
Scientific	1	56
Scientific	1	104
Scientific	1	108
Scientific	1	115
Scientific	1	428
