# Supplementary material for: Unravelling potential plant health threats for the European Union: application of horizon scanning methodology
Source: Copernicus journal article supplement (doi:10.5194/we-25-189-2025), 2025-10-21
Supplement: Supplementary file 4 [file supplements captions.docx]

Figure S1. PeMoScoring scheme. Items are represented by purple squares, and the fifteen criteria evaluated through questions are shown as white squares with purple borders.

Figure S2. Record of reports and pests through horizon scanning (HS) (a) Record of HS reports, including media newsletters, scientific, and horizon scanning newsletters. (b) Number of pests under European Union regulation (in purple) and those cited in HS reports (in purple).

Figure S3. Timeline of PeMo positive-scored pests included in Pest categorization. The x-axis represents time. The dark purple point marks the date of PeMoScoring, and the light purple point indicates the Pest categorization date. Results are further classified by the Pest categorization outcome: inconclusive, negative or positive.

Table S1.Descriptive tables with (1) topic classification into three groups: assessment, management, and new observations; (2) classification of host plants into four classes: crop, forest, ornamental, and wild. (3) distribution of number of sources (media or scientific) per number of articles.
