# Supplementary material for: Unravelling potential plant health threats for the European Union: application of horizon scanning methodology
Source: Copernicus journal article supplement (doi:10.5194/we-25-189-2025), 2025-10-21
Supplement: Supplementary file [file we-25-189-2025-supplement-title-page.pdf › we-25-189-2025-supplement-title-page.pdf]

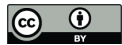

## *Supplement of*

# **Unravelling potential plant health threats for the European Union: application of horizon scanning methodology**

**María Ribaya et al.**

*Correspondence to:* María Ribaya (mribaya.mu@gmail.com)

- we-25-189-2025-supplement-title-page.pdf
- Table S1.xlsx
- fS1.PNG
- fS2.PNG
- fS3.PNG
- supplements captions.docx

The copyright of individual parts of the supplement might differ from the article licence.
